## Effects of Infrarenal Aortic Cross-clamping on Renal Hemodynamics in Humans

Z. Gamulin, M.D.,\* A. Forster, M.D.,† D. Morel, M.D.,‡ F. Simonet, M.D.,§ E. Aymon, M.D.,‡ H. Favre, M.D.§

While the systemic cardiovascular consequences of infrarenal aortic cross-clamping during aortic abdominal surgery are well documented, its repercussions on renal hemodynamics in humans have not been reported. In 12 patients, scheduled for elective aortic surgery, renal clearances, using  $^{51}\text{Cr}$  EDTA and  $^{125}\text{I}$  hippuran, were measured before, during, and after infrarenal aortic cross-clamping. A continuous infusion of mannitol 20% at a rate of 100 ml/h was administered throughout the study. Arterial and renal venous blood sampling, obtained at the midpoint of each period, permitted calculation of the extraction fraction of  $^{125}\text{I}$  hippuran and accurate determination of renal blood flow and its cortical-extracortical distribution. Although cardiac output and systemic vascular resistance did not change significantly between the three study periods, infrarenal aortic cross-clamping decreased  $^{125}\text{I}$  hippuran clearance by  $29 \pm 15\%$  ( $P < 0.05$ ) and renal blood flow by  $38 \pm 14\%$  ( $P < 0.001$ ). Simultaneously, an increase of  $75 \pm 31\%$  in renal vascular resistance ( $P < 0.05$ ) was observed and the extraction fraction of  $^{125}\text{I}$  hippuran increased from  $0.67 \pm 0.05$  to  $0.74 \pm 0.05$  ( $P < 0.01$ ). All of these changes, which indicate global diminution of renal perfusion with a redistribution of renal blood flow toward the cortical compartment, persisted for at least 1 h after release of the aortic clamp. Early signs of renal tubular damage, such as the appearance of lysozyme and ligandine in the urine, however, were never observed. The authors conclude that infrarenal aortic cross-clamping produces profound and sustained alterations in renal hemodynamics and may be harmful in patients with impaired renal function or when surgical occlusion of the aorta is prolonged. (Key words: Arteries: abdominal aorta. Kidney: blood flow; filtration.)

PREVENTION AND TREATMENT of the systemic hemodynamic consequences of infrarenal aortic cross-clamping occurring in patients during aortic abdominal surgery are well documented.<sup>1-5</sup> Even patients with cardiac or coronary insufficiency can tolerate this surgical procedure.<sup>6,7</sup> However, despite the progress in surgical and anesthetic management, decreased renal function still is observed after aortic abdominal surgery and remains an important problem in the postoperative period.<sup>8-12</sup> Although the pathogenesis of this renal impairment is not well understood, it probably is related to aortic cross-

clamping, which is mandatory during aortic abdominal surgical procedures. The results of numerous experimental studies investigating the effects of infrarenal aortic cross-clamping on renal perfusion<sup>13-17</sup> and intrarenal blood flow distribution<sup>15-17</sup> are not conclusive and do not provide sufficient information to understand the renal dysfunction occurring in humans after aortic abdominal surgery. The purpose of this study was to evaluate the renal consequences of infrarenal aortic cross-clamping in humans by measuring renal clearances, global renal blood flow, and its distribution between cortical and extracortical compartments in patients undergoing surgical procedures on the abdominal aorta.

### Patients and Methods

Twelve patients, two women and 10 men, scheduled for elective aortic abdominal grafting surgery, gave their informed consent to participate in this study; which was approved by the Committee for Ethics in Clinical Research of our institution. Six patients were operated for aortoiliac occlusive disease and the other six for non ruptured aortic aneurysm. The age of the patients ranged from 55 to 75 yr (mean 64 yr). Only three subjects were affected by cardiovascular medication, one was taking digoxin and verapamil for atrial fibrillation and congestive heart failure, one labetalol for coronary artery disease, and one reserpine for systemic arterial hypertension. The remaining nine patients were free from medication and known diseases, besides their abdominal aortic pathology.

The patients were premedicated with morphine sulfate 0.1 mg/kg im 60-90 min before arrival in the operating room. Anesthesia was induced with bolus doses of fentanyl (5  $\mu\text{g}/\text{kg}$ ) and thiopental (3-5 mg/kg); tracheal intubation was facilitated with pancuronium bromide (0.1 mg/kg). Throughout the surgical procedure, anesthesia was maintained with nitrous oxide 60% in oxygen and fentanyl, which was infused continuously at the rate of 8-12  $\mu\text{g} \cdot \text{kg}^{-1} \cdot \text{h}^{-1}$ . Additional pancuronium was administered as needed. The patients were ventilated with a volume cycled ventilator and maintained at a  $\text{PaCO}_2$  between 35-40 mmHg and a  $\text{PaO}_2$  between 80-120 mmHg. Temperature was maintained above 35°C. The following variables were monitored continuously in all patients: heart rate, mean arterial pressure (MAP) using an indwelling arterial catheter, central venous pressure (CVP), and urinary output (UO).

\* Staff Anesthesiologist, Department of Anesthesiology.

† Research Associate, Department of Anesthesiology.

‡ Staff Surgeon, Clinic of Cardiovascular Surgery.

§ Associate Professor, Division of Nephrology.

Received from the Departments of Anesthesiology, Surgery and Medicine, University Hospital of Geneva, 1211 Geneva 4, Switzerland. Accepted for publication March 8, 1984. Supported by grant from the Montus Foundation, Presented in part at the Annual Meeting of the American Society of Anesthesiologists, Atlanta, Georgia, October 12, 1983.

Address reprint requests to Dr. Gamulin.

Glomerular filtration rate and renal plasma flow were measured using clearances of  $^{51}\text{Cr}$  EDTA ( $C_{\text{EDTA}}$ ) and  $^{125}\text{I}$  hippuran ( $C_{\text{HIP}}$ ), respectively. The labeled compounds were injected immediately after induction of anesthesia as a bolus of 60  $\mu\text{Ci}$   $^{51}\text{Cr}$  EDTA and 30  $\mu\text{Ci}$   $^{125}\text{I}$  hippuran. In addition, a continuous infusion of 72  $\mu\text{Ci}$   $^{51}\text{Cr}$  EDTA and 36  $\mu\text{Ci}$   $^{125}\text{I}$  hippuran in 500 ml mannitol 20% at a rate of 100 ml/h was administered throughout the study in order to obtain an adequate UO and stable blood levels of labeled compounds that were, respectively, less than 6  $\mu\text{g/l}$  for  $^{51}\text{Cr}$  EDTA and less than 100  $\mu\text{g/l}$  for  $^{125}\text{I}$  hippuran.

After an equilibrium period of  $64 \pm 17$  min ( $\bar{x} \pm \text{SD}$ ), urine was collected through an indwelling intravesical catheter during three consecutive periods: 1) before infrarenal aortic cross-clamping for  $61 \pm 16$  min (pre-clamp); 2) during infrarenal aortic cross-clamping for  $58 \pm 20$  min (perclamp); 3) after infrarenal aortic cross-clamping for  $56 \pm 11$  min (postclamp).

At the midpoint of each period of urine collection, in order to calculate the extraction fraction of  $^{125}\text{I}$  hippuran ( $E_{\text{HIP}}$ ), arterial blood was withdrawn from the radial artery, and renal venous blood was sampled by the surgeon, who punctured the left renal vein close to the kidney and withdrew blood very slowly to avoid vena cava blood contamination. At the time of blood sampling in all patients, standard hemodynamic data were recorded, which in six patients included measurements of cardiac output (CO) in triplicate and pulmonary capillary wedge pressure using a quadruple lumen Swan-Ganz® 7F catheter and the thermodilution technique. Throughout the study, the blood loss was monitored and Ringer's lactate and blood were administered in order to maintain filling pressures and hematocrit (Ht) at preclamp levels.

In order to determine the possible influence of the anesthetic management on  $E_{\text{HIP}}$ , which cannot be measured noninvasively,  $E_{\text{HIP}}$  was measured in three additional nonanesthetized patients during aortic angiography. These measurements were performed before the injection of contrast medium. The patients were similar to the 12 anesthetized patients as regards age and existing pathology.

Plasma and urinary radioactivity of  $^{51}\text{Cr}$  EDTA and  $^{125}\text{I}$  hippuran were measured with an auto-gamma scintillation spectrometer (Packard 5230).  $C_{\text{EDTA}}$ ,  $C_{\text{HIP}}$ , creatinine clearance ( $C_{\text{CR}}$ ),  $E_{\text{HIP}}$ , renal blood flow (RBF), filtration fraction (FF), free water clearance ( $C_{\text{H}_2\text{O}}$ ) and systemic and renal vascular resistances (SVR, RVR) were calculated using the following equations:

$$C_{\text{EDTA}} (\text{ml/min}) = \frac{\text{urinary } ^{51}\text{Cr EDTA} \times \text{UO (ml/min)}}{\text{plasma } ^{51}\text{Cr EDTA}}$$

$C_{\text{HIP}}$  and  $C_{\text{CR}}$  were obtained using the same formula by replacing  $^{51}\text{Cr}$  EDTA with  $^{125}\text{I}$  hippuran or creatinine.

$$E_{\text{HIP}} = \frac{\text{arterial plasma } ^{125}\text{I hippuran} - \text{renal venous plasma } ^{125}\text{I hippuran}}{\text{arterial plasma } ^{125}\text{I hippuran}}$$

$$\text{RBF (ml/min)} = \frac{C_{\text{HIP}}}{E_{\text{HIP}}} \times \frac{100}{100 - \text{Ht}}$$

$$\text{FF} = \frac{C_{\text{EDTA}}}{C_{\text{HIP}}}$$

$$C_{\text{H}_2\text{O}} (\text{ml/min}) = \text{UO (ml/min)} - \text{UO (ml/min)}$$

$$\times \frac{\text{urinary osmolality}}{\text{plasma osmolality}}$$

$$\text{SVR (dyn} \cdot \text{s} \cdot \text{cm}^{-5}) = \frac{\text{MAP} - \text{CVP}}{\text{CO}} \times 80$$

$$\text{RVR (dyn} \cdot \text{s} \cdot \text{cm}^{-5}) = \frac{\text{MAP} - \text{CVP}}{\text{RBF}} \times 80$$

The renal fraction of CO is expressed as RBF/CO ratio.

Urinary lysozyme was measured using a modified method according to Favre *et al.*,<sup>18</sup> and ligandine was measured using the method of Habig *et al.*<sup>19</sup>

The results were expressed as means  $\pm$  SD. All data of renal perfusion were normalized for body surface area of 1.73 m<sup>2</sup>. The data obtained during three study periods were compared with one-way analysis of variance and statistical difference detected with the test of Scheffé, with  $P < 0.05$  being considered significant.

## Results

The preoperative renal function was in the normal ranges for all patients as evidenced by the  $C_{\text{CR}}$  of  $83 \pm 23$  ml/min.<sup>20</sup> On arteriography, the size of both kidneys was normal, the secretion of contrast medium was symmetric, and adequate and the renal vessels were free of any pathology.

Hemodynamic, respiratory, and metabolic variables remained stable during the study; vasopressors, vasodilators, or bicarbonate never were administered. The Ht was maintained at  $38 \pm 4\%$ ,  $36 \pm 3\%$ , and  $37 \pm 4\%$  in the preclamp, perclamp, and postclamp period, respectively, by administering whole blood ( $700 \pm 85$  ml).

Systemic hemodynamic results are summarized in table 1. No significant change in any variable measured was observed before, during, and after infrarenal aortic cross-clamping.

Renal hemodynamic and functional data are presented in table 2. Besides UO,  $C_{\text{EDTA}}$ , and FF, the other variables measured varied significantly during perclamp period, without returning to basal values during the first hour of observation after release of the aortic clamp. Infrarenal aortic cross-clamping produced a significant decrease of  $29 \pm 15\%$  in  $C_{\text{HIP}}$ ,  $38 \pm 14\%$  in

TABLE 1. Systemic Hemodynamic Variables Measured at Midpoint of Preclamp, Perclamp, and Postclamp Period ( $\bar{x} \pm SD$ )

|                                                                        |        | Preclamp        | Perclamp        | Postclamp       |
|------------------------------------------------------------------------|--------|-----------------|-----------------|-----------------|
| Heart rate (beats/min)                                                 | n = 12 | 77 $\pm$ 12     | 70 $\pm$ 13     | 68 $\pm$ 12     |
| Mean arterial pressure (mmHg)                                          | n = 12 | 100 $\pm$ 12    | 104 $\pm$ 9     | 96 $\pm$ 12     |
| Central venous pressure (cmH <sub>2</sub> O)                           | n = 12 | 6 $\pm$ 4       | 6 $\pm$ 3       | 7 $\pm$ 3       |
| Pulmonary capillary wedge pressure (mmHg)                              | n = 6  | 10 $\pm$ 2      | 10 $\pm$ 1      | 11 $\pm$ 2      |
| Cardiac output (l/min)                                                 | n = 6  | 4.8 $\pm$ 0.9   | 4.0 $\pm$ 0.8   | 4.4 $\pm$ 0.9   |
| Systemic vascular resistance (dyn $\cdot$ s $\cdot$ cm <sup>-5</sup> ) | n = 6  | 1,570 $\pm$ 403 | 1,946 $\pm$ 513 | 1,682 $\pm$ 427 |

RBF and a significant increase of  $75 \pm 31\%$  in RVR.  $E_{HIP}$  increased also significantly from  $0.67 \pm 0.05$  to  $0.74 \pm 0.05$ ; individual variations are presented in figure 1. All these changes remained significantly different in the postclamp period when compared with the preclamp data, but not different when compared with perclamp data. The  $E_{HIP}$  measured preoperatively in three patients under local anesthesia was similar to the preclamp data, respectively, 0.65, 0.67, and 0.70.

Individual variations of RBF/CO ratio during the three investigation periods are presented in figure 2. The mean values decreased from  $0.25 \pm 0.03$  in the preclamp period to  $0.17 \pm 0.04$  and  $0.15 \pm 0.07$  in the perclamp and postclamp period, respectively. Significant changes were noted only between preclamp and postclamp values.

Lysozyme and ligandine were not detected in any urine sample during the study. The following variables did not change significantly at any time:  $C_{CR}$  was  $83 \pm 23$ ,  $64 \pm 13$ , and  $65 \pm 18$  ml/min and  $C_{H_2O}$  was  $-1.01 \pm 2.01$ ,  $-1.28 \pm 0.88$ , and  $-1.48 \pm 0.41$  ml/min in the preclamp, perclamp, and postclamp periods, respectively.

### Discussion

Measurements of  $C_{HIP}$  and  $E_{HIP}$  allow for an accurate evaluation of the renal perfusion. It generally is agreed that  $C_{HIP}$  corresponds to the cortical or effective renal plasma flow.<sup>21,22</sup> By dividing  $C_{HIP}$  by  $E_{HIP}$ , total renal plasma flow can be calculated.<sup>20</sup> From these values, information can be obtained about the distribution of

the total renal plasma and/or blood flow between cortical and extracortical fractions.<sup>23,24</sup>

This study demonstrated a profound alteration in renal hemodynamics during occlusion of the aorta below the renal arteries, characterized by a 75% increase in RVR and a 38% decrease in RBF, whereas systemic cardiovascular variables did not change significantly. Although there was a tendency toward a decrease in CO, the observed changes in renal perfusion can be attributed mainly to infrarenal aortic cross-clamping, since the anesthetic drugs and mannitol were administered continuously throughout the study, ventilatory management was unchanged, and blood volume was maintained at the preclamp level. With one exception,<sup>14</sup> most experimental studies reported no change in RBF during infrarenal aortic cross-clamping.<sup>13,15-17</sup> These conflicting data may be explained by differences in species, in techniques of measurement of RBF, and in preoperative kidney function. In addition, the patients investigated were suffering from severe arteriosclerosis, which can explain the low  $E_{HIP}$  calculated in the preclamp period. In the experimental studies, the animals were most probably free from any vascular disease.

Thus, the values of  $C_{EDTA}$ ,  $C_{HIP}$ , FF, and  $E_{HIP}$  measured in the preclamp period are compatible, as postulated by Reubi,<sup>20</sup> with a situation where some nephrons had been destroyed and replaced by nonfunctioning inert tissue that are still perfused, while the remaining nephrons function normally. This hypothesis is supported by histologic data.<sup>25</sup> Since the blood perfusing the inert kidney tissue does not clear the labeled compounds, a slight decrease in  $C_{EDTA}$  and  $C_{HIP}$ , and a

TABLE 2. Renal Hemodynamic and Functional Changes Produced by Infrarenal Aortic Cross-clamping and Declamping ( $\bar{x} \pm SD$ , n = 12)

|                                                                     | Preclamp          | Perclamp            | Postclamp           |
|---------------------------------------------------------------------|-------------------|---------------------|---------------------|
| Urinary output (ml/min)                                             | 4.45 $\pm$ 3.42   | 3.10 $\pm$ 1.58     | 3.03 $\pm$ 1.69     |
| <sup>51</sup> Cr EDTA clearance (ml/min)                            | 90 $\pm$ 27       | 71 $\pm$ 18         | 71 $\pm$ 30         |
| <sup>125</sup> I hippuran clearance (ml/min)                        | 429 $\pm$ 118     | 298 $\pm$ 77*       | 267 $\pm$ 109†      |
| Extraction fraction of <sup>125</sup> I hippuran                    | 0.67 $\pm$ 0.05   | 0.74 $\pm$ 0.05†    | 0.75 $\pm$ 0.06†    |
| Renal blood flow (ml/min)                                           | 1,034 $\pm$ 254   | 622 $\pm$ 135‡      | 566 $\pm$ 226‡      |
| Filtration fraction                                                 | 0.22 $\pm$ 0.06   | 0.25 $\pm$ 0.06     | 0.27 $\pm$ 0.06     |
| Renal vascular resistance (dyn $\cdot$ s $\cdot$ cm <sup>-5</sup> ) | 7,901 $\pm$ 2,617 | 13,517 $\pm$ 4,144* | 14,884 $\pm$ 6,124† |

Statistical difference from preclamp data: \* $P < 0.05$ , † $P < 0.01$ , ‡ $P < 0.001$

normal value for FF are expected; whereas  $E_{HIP}$  is decreased markedly, since it represents a more sensitive index of the amount of normal renal tissue. In addition,  $E_{HIP}$  also can be influenced by other factors such as ventilation,<sup>26</sup> saline and mannitol infusion,<sup>27,28</sup> or anesthetic drugs.<sup>29-31</sup> However, the  $E_{HIP}$  values obtained in the three nonanesthetized patients with advanced arteriosclerosis were similar to our preclamp data; RBF and RBF/CO ratio in the preclamp period were in normal ranges, and  $C_{CR}$  did not change during the preclamp period when compared with preoperative values. All these data suggest that the anesthetic management probably did not affect at any time the intrarenal blood flow distribution or global renal perfusion and function.

The significant decrease in  $C_{HIP}$  and the significant increase in  $E_{HIP}$  observed during aortic cross-clamping in each patient (fig. 1) indicate a global diminution of the renal perfusion with redistribution of the RBF toward the cortical compartment; this phenomenon is beneficial and can prevent the development of acute tubular necrosis. The intrarenal blood flow redistribution in favor of the cortex during occlusion of the aorta was not found in experimental studies where no change or decrease in cortical blood flow was demonstrated.<sup>15-17</sup> It is difficult to define the protective role of mannitol, which has been shown to preserve cortical<sup>32</sup> as well as total renal perfusion<sup>14</sup> during infrarenal aortic cross-clamping in animals. In this study, mannitol was administered only in order to obtain adequate UO and more accurate renal measurements. Furthermore, the absence of a significant decrease in  $C_{EDTA}$  in the presence of an important reduction in RBF demonstrates preservation of the intrarenal autoregulatory mechanism.

The renal hemodynamic deterioration observed during infrarenal aortic cross-clamping persisted for at least 1 h after the release of the aortic clamp. No systemic cardiovascular changes can explain that phenomenon, since blood volume remained stable and CO tended to increase. Therefore, the absence of early recovery at the end of aortic occlusion could be related to a sustained renal vasoconstriction, which may be secondary to stimulation of the renin-angiotensin system induced by the clamping of the aorta as demonstrated in humans<sup>33,34</sup> as well as in experimental animals.<sup>16,17</sup>

It would have been of great interest to continue the measurements until they returned to control values. However, this was not possible, because we felt it was unethical to prolong the surgical procedure only in order to perform direct renal vein sampling. In order to assess other important factors that could influence renal hemodynamics, such as prolonged anesthetic management or surgical stimulation, it would have been very helpful to perform similar determinations in a

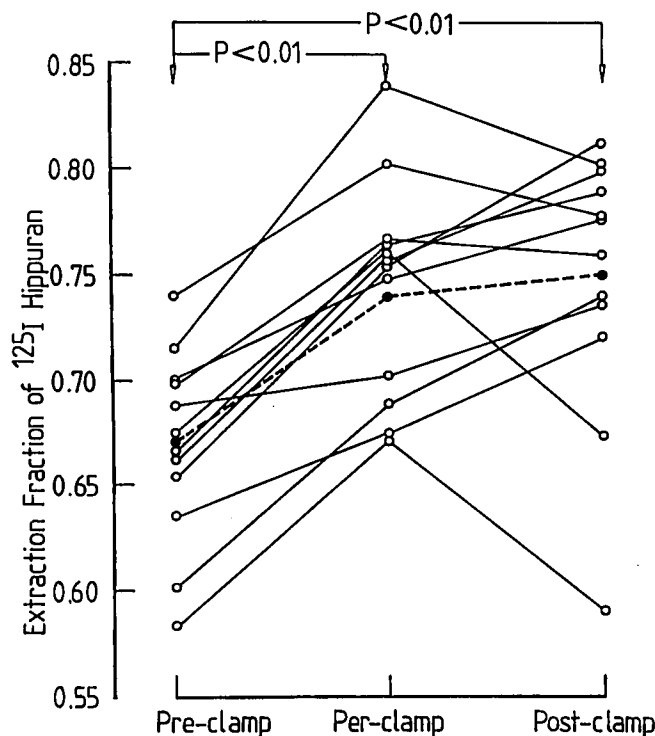

FIG. 1. Individual (O —) and mean (● ---) changes of extraction fraction of  $^{125}\text{I}$  hippuran during three investigation periods.

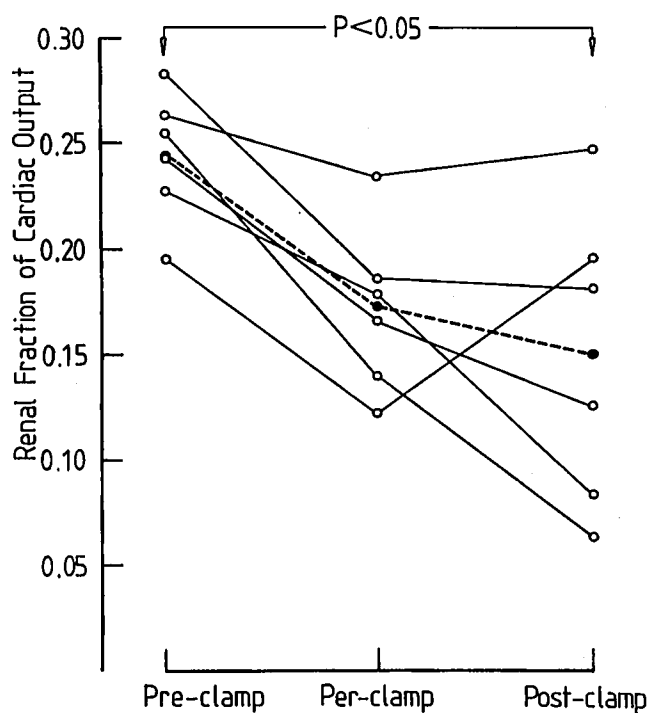

FIG. 2. Individual (O —) and mean (● ---) variations of renal fraction of cardiac output in the six patients monitored with Swan-Ganz® catheter.

control group. For methodologic reasons, we considered it unethical to use such invasive measurements in patients suffering from advanced arteriosclerosis undergoing peripheral vascular surgery, who would represent the only appropriate control group. Fentanyl and nitrous oxide, however, which were administered continuously throughout the study, are most probably not responsible for the sustained decrease in renal perfusion in the postclamp period, since it was reported that 100  $\mu\text{g}/\text{kg}$  of fentanyl in humans,<sup>35</sup> and 1 mg/kg in animals<sup>36</sup> in combination with nitrous oxide did not affect renal function and perfusion. The highest total dose of fentanyl administered in this study was under 50  $\mu\text{g}/\text{kg}$ .

With the anesthetic management described, which was intended to maintain CO, extracellular fluid volume, and Ht, the changes observed in renal perfusion did not produce any detectable renal lesion. Integrity of the proximal tubular cells was demonstrated by the absence of lysozyme<sup>18</sup> and ligandine<sup>37</sup> in the urine, while the integrity of the distal segment of the nephron was evidenced by a negative  $\text{C}_{\text{H}_2\text{O}}$ .

In conclusion, infrarenal aortic cross-clamping produced profound and sustained alterations in renal hemodynamics, which may have been more profound without administration of mannitol. The observed changes were close to the point where acute tubular necrosis occurs, therefore, this study emphasizes the importance to maintain adequate CO and renal perfusion pressure to avoid acute renal failure after aortic abdominal grafting surgery. In addition, in patients with obvious preoperative renal dysfunction or who undergo prolonged aortic cross-clamping kidney damage may occur. Further studies are needed to devise methods that would provide better protection of the kidney during aortic cross-clamping such as hypothermia or for example renin or calcium antagonists.

The authors thank Mrs. Geneviève Lucot and Mr. Djaid Robertson for their excellent technical assistance. The authors are grateful to Mrs. Marie-Claude Froment and Carmen Meylan for their secretarial work.

### References

- Meloche R, Pottecher T, Audet J, Dufresne O, Le Page C: Haemodynamic changes due to clamping of the abdominal aorta. *Can Anaesth Soc J* 24:20-34, 1977
- Lunn JK, Dannemiller FJ, Stanley TH: Cardiovascular responses to clamping of the aorta during epidural and general anesthesia. *Anesth Analg* 58:372-376, 1979
- Silverstein PR, Caldera DL, Cullen DJ, Davison JK, Darling RC, Emerson CW: Avoiding the hemodynamic consequences of aortic cross-clamping and unclamping. *ANESTHESIOLOGY* 50:462-466, 1979
- Jaboeuf R, Freysz M, Ahouangbevi A, Coulon C, Baguet G, Caillard B: La chirurgie de l'anévrisme de l'aorte abdominale sous-rénale. *Anesth Analg (Paris)* 38:119-123, 1981
- Schmucker P, Franke N, Vogel H, Martin E, Van Ackern K, Laubenthal H, Becker HM: Haemodynamische Veränderungen bei der Operation infrarenaler Bauchaortenaneurysmen. *Anaesthesist* 31:155-160, 1982
- Attia RR, Murphy JD, Snider M, Lappas DG, Darling RC, Lowenstein E: Myocardial ischemia due to infrarenal aortic cross-clamping during aortic surgery in patients with severe coronary artery disease. *Circulation* 53:961-965, 1976
- Gooding JM, Archie JP, McDowell H: Hemodynamic response to infrarenal aortic cross-clamping in patients with and without coronary artery disease. *Crit Care Med* 8:382-385, 1980
- McCombs PR, Roberts B: Acute renal failure following resection of abdominal aortic aneurysm. *Surg Gynecol Obstet* 148:175-178, 1979
- Whittemore AD, Clowes AW, Hechtman HB, Mannick JA: Aortic aneurysm repair. Reduced operative mortality associated with maintenance of optimal cardiac performance. *Ann Surg* 192:414-420, 1980
- Crawford ES, Bomberger RA, Glaeser DH, Saleh SA, Russel WL: Aortoiliac occlusive disease. Factors influencing survival and function following reconstructive operation over a twenty-five year period. *Surgery* 90:1055-1066, 1981
- Crawford ES, Saleh SA, Babb JW III, Glaeser DH, Vaccaro PS, Silver SA: Infrarenal abdominal aortic aneurysm. Factors influencing survival after operation performed over a 25-year period. *Ann Surg* 193:699-708, 1981
- Diehl JT, Cali RF, Hertzner NR, Beven EG: Complications of abdominal aortic reconstruction. *Ann Surg* 197:49-56, 1983
- Foster JH, Adkins RB, Chamberlain NO, Symbas PN, Harris AP: The renal effects of lower abdominal aortic cross-clamping. *JAMA* 183:451-454, 1963
- Stein M, James PM, Kelly J, Brown D, Shircliffe AC, Patterson WE: Renal protection during aortic cross-clamping. *Am Surg* 38:681-689, 1972
- Abbott WM, Cooper JD, Austen WC: The effect of aortic clamping and declamping on renal blood flow distribution. *J Surg Res* 14:385-392, 1973
- Berkowitz HD, Shetty S: Renin release and renal cortical ischemia following aortic cross clamping. *Arch Surg* 109:612-617, 1974
- Cronenwett JL, Lindenauer SM: Distribution of intrarenal blood flow following aortic clamping and declamping. *J Surg Res* 22: 469-482, 1977
- Favre H, Wauters JP, Mach RS: *Advances in Nephrology*, Volume 1. Chicago, Year Book Medical Publishers, 1971, pp 195-205
- Habig WH, Pabst MJ, Jakoby WB: The first enzymatic step in mercapturic acid formation. *J Biol Chem* 249:7130-7139, 1974
- Reubi FC: *Clearance Tests in Clinical Medicine*. Springfield, Charles C Thomas, 1963, pp 16-24, 50-51, 58-68
- Ram MD, Evans K, Chisholm GD: Measurement of effective renal plasma flow by the clearance of <sup>125</sup>I Hippuran. *Lancet* 2:645-646, 1967
- Maher FT, Elveback LR: Simultaneous renal clearances of <sup>125</sup>I and <sup>131</sup>I labelled orthoiodo hippurate and paraaminohippurate in the estimation of effective renal plasma flow in man. *Mayo Clin Proc* 45:657-661, 1970
- Larson CP, Mazze RI, Cooperman LH, Wollman H: Effects of

- anesthetics on cerebral renal and splanchnic circulations. *ANESTHESIOLOGY* 41:169-181, 1974
24. Eklund J: Measurement of renal blood flow in anaesthesia and intensive care. *Acta Anaesthesiol Scand (Suppl)* 70:21-26, 1978
25. McLachlan MSF: The ageing kidney. *Lancet* 2:143-146, 1978
26. Moore ES, Galvez MB, Paton JB, Fisher DE, Behrman RE: Effects of positive pressure ventilation on intrarenal blood flow in infant primates. *Pediatr Res* 8:792-796, 1974
27. Nissen OI: Changes in the filtration fractions in the superficial and deep venous drainage area of the cat kidney due to fluid loading. *Acta Physiol Scand* 73:320-328, 1968
28. Velasquez MT, Notargiacomo AV, Cohn JN: Comparative effects of saline and mannitol on renal cortical blood flow and volume in the dog. *Am J Physiol* 224:322-327, 1973
29. Hirasawa H, Yonezawa T: The effects of ketamine and innovar on the renal cortical and medullary blood flow of the dog. *Anaesthesist* 24:349-353, 1975
30. Leighton K, Bruce C: Distribution of kidney blood flow: A comparison of methoxyflurane and halothane effects as measured by heated thermocouple. *Can Anaesth Soc J* 22:125-137, 1975
31. Bastron RD, Pyne JL, Inagaki M: Halothane-induced renal vasodilatation. *ANESTHESIOLOGY* 50:126-131, 1979
32. Abbott WM, Austen WG: The reversal of renal cortical ischemia during aortic occlusion by mannitol. *J Surg Res* 16:482-489, 1974
33. Gal TJ, Cooperman LH, Berkowitz HD: Plasma renin activity in patients undergoing surgery of the abdominal aorta. *Ann Surg* 179:65-69, 1974
34. Grant RP, Jenkins LC: Modification by preoperative beta-blockade of the renin response to infrarenal aortic cross-clamping. *Can Anaesth Soc J* 30:480-486, 1983
35. Kono K, Philbin DM, Coggins CH, Moss J, Rosow CE, Schneider RC, Slater EE: Renal function and stress response during halothane or fentanyl anesthesia. *Anesth Analg* 60:552-556, 1981
36. Bidwai AV, Liu WS, Stanley TH, Bidwai V, Loeser EA, Shaw L: The effects of large doses of fentanyl and fentanyl with nitrous oxide on renal function in the dog. *Can Anaesth Soc J* 23:296-302, 1976
37. Feinfeld DA, Bourgoignie JJ, Fleischner G, Goldstein EJ, Biempica L, Arias IM: Ligandinuria in nephrotoxic acute tubular necrosis. *Kidney Int* 12:387-392, 1977
